# Supplementary material for: Expression of B-class MADS-box genes in response to variations in photoperiod is associated with chasmogamous and cleistogamous flower development in Viola philippica
Source: PubMed Central journal article supplement (PMC4936093; doi:10.1186/s12870-016-0832-2), 2016-07-07
Supplement: 12870_2016_832_MOESM1_ESM.pdf [file 12870_2016_832_MOESM1_ESM.pdf]

**Table S1.** Protein sequence variation of AP3- (a) and PI-lineage (b) genes.

| <b>a</b> | LeDEF  | PfDEF  | NtDEF  | PhDEF | AmDEF  | MtNMH7 | AtAP3 | MtTM6  | PhTM6 | LeTM6 | PfTM6 | VpTM6-1 | VpTM6-2 | OsMADS16 |
|----------|--------|--------|--------|-------|--------|--------|-------|--------|-------|-------|-------|---------|---------|----------|
| VpTM6-1  | 57.6   | 59.7   | 61.4   | 59.7  | 61.4   | 53.9   | 53.7  | 62.3   | 66.8  | 62.2  | 64.8  | 100     | 92.6    | 54.0     |
| VpTM6-2  | 55.5   | 59.4   | 61.4   | 60.3  | 60.1   | 53.7   | 51.1  | 62.0   | 64.6  | 59.4  | 63.4  | 92.6    | 100     | 53.6     |
| <b>b</b> | LeGLO2 | PfGLO1 | PfGLO2 | NtGLO | PhGLO1 | PhGLO2 | MtPI  | MtNGL9 | AmGLO | AtPI  | VpPI  | OsMADS2 |         |          |
| VpPI     | 65.1   | 64.8   | 67.0   | 66.7  | 65.4   | 67.5   | 71.3  | 64.1   | 67.9  | 63.2  | 100   | 61.0    |         |          |
