# Supplementary material for: Expression of B-class MADS-box genes in response to variations in photoperiod is associated with chasmogamous and cleistogamous flower development in Viola philippica
Source: PubMed Central journal article supplement (PMC4936093; doi:10.1186/s12870-016-0832-2), 2016-07-07
Supplement: 12870_2016_832_MOESM2_ESM.pdf [file 12870_2016_832_MOESM2_ESM.pdf]

**Table S2.** Amino acid divergence between the two VpTM6 paralogs.

| Amino acid substitution | PROVPROVEAN score   | Amino acid property  | Amino acid deletion / insertion                                |
|-------------------------|---------------------|----------------------|----------------------------------------------------------------|
| K10M                    | -1.792, Neutral     | Basic to Nonpolar    |                                                                |
| S50N                    | 0.091, Neutral      | Polar to Polar       |                                                                |
| S61A                    | -2.000, Neutral     | Polar to Nonpolar    | S63_T64insYV (-10.595, Deleterious)<br>Y, Polar; V, Nonpolar   |
| K66M                    | -3.735, Deleterious | Basic to Nonpolar    |                                                                |
| T82A                    | -0.996, Neutral     | Polar to Nonpolar    |                                                                |
| R139K                   | 2.751, Neutral      | Basic to Basic       |                                                                |
| C150Y                   | 3.753, Neutral      | Polar to Polar       |                                                                |
| N182D                   | -2.321, Neutral     | Polar to Acid        |                                                                |
| F185A                   | -0.058, Neutral     | Nonpolar to Nonpolar |                                                                |
| V190L                   | -0.001, Neutral     | Nonpolar to Nonpolar |                                                                |
| H182L                   | 3.244, Neutral      | Basic to Nonpolar    | N207_H210del (-1.671, Neutral)<br>N, Polar; Q, Polar; H, Basic |
| E215D                   | 0.478, Neutral      | Basic to Basic       |                                                                |
| R220G                   | 3.155, Neutral      | Acid to Polar        |                                                                |

PROVEAN Score was predicted by PROVEAN (<http://provean.jcvi.org>). The cutoff value was -2.5, when the score more than -2.5 the prediction was neutral; when the score was less than -2.5, the prediction was deleterious. S63\_T64insYV, VpTM6-2 has Y and V while VpTM6-1 lose the two amino acids; N207\_H210del, 4 amino acids from N at position 207 to H at position 210 in VpTM6-1 were deleted from VpTM6-2. The sequence alignment of the two VpTM6 proteins is presented in Figure 3A.
