# Supplementary material for: Expression of B-class MADS-box genes in response to variations in photoperiod is associated with chasmogamous and cleistogamous flower development in Viola philippica
Source: PubMed Central journal article supplement (PMC4936093; doi:10.1186/s12870-016-0832-2), 2016-07-07
Supplement: 12870_2016_832_MOESM3_ESM.pdf [file 12870_2016_832_MOESM3_ESM.pdf]

**a**

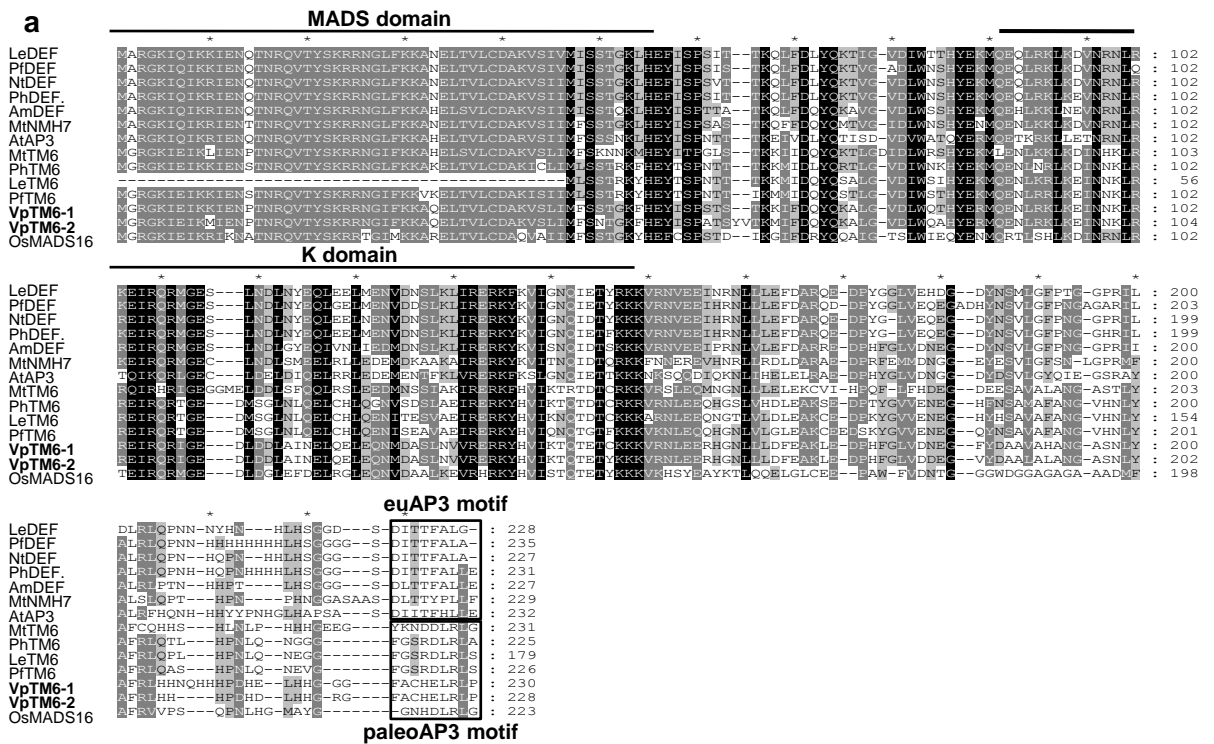

**b**

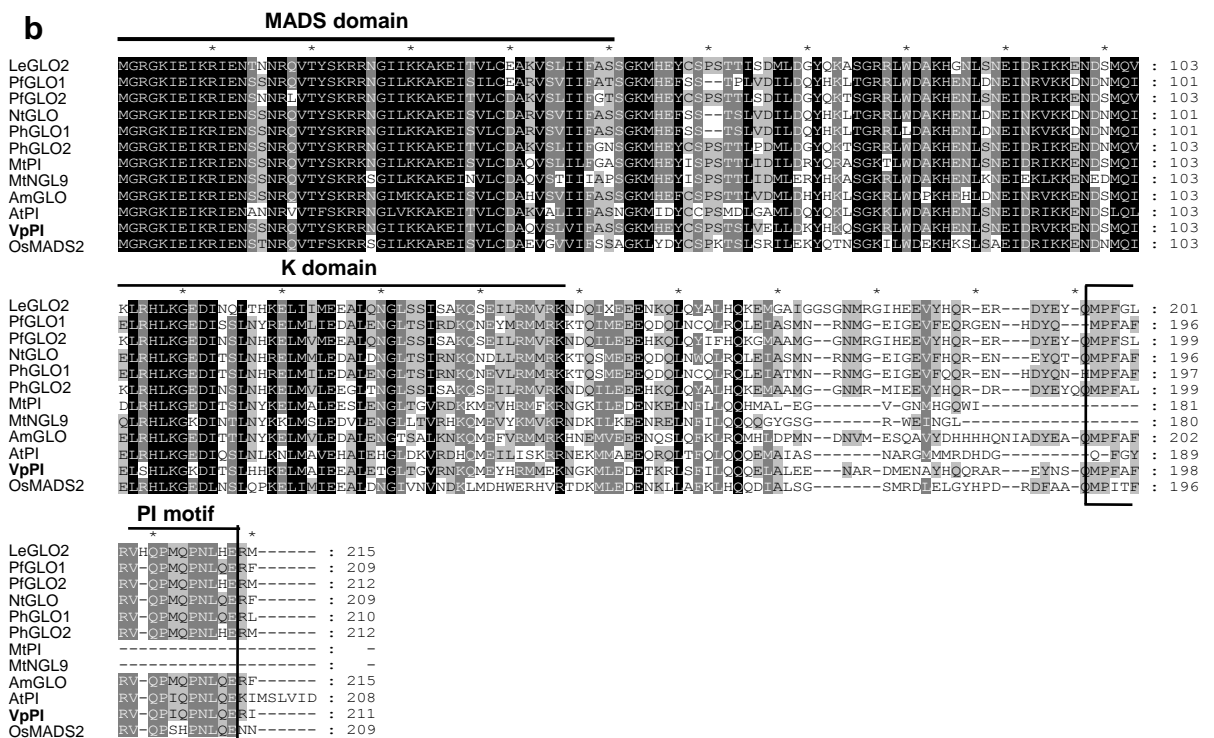

**Figure S1.** Multiple sequence alignment of B-class MADS-box genes.

**a** AP3-lineage. **b** PI-lineage. Gaps are introduced for proper alignment. The M, I, K, and C domains of each MADS-domain protein are indicated.
