# Supplementary material for: Expression of B-class MADS-box genes in response to variations in photoperiod is associated with chasmogamous and cleistogamous flower development in Viola philippica
Source: PubMed Central journal article supplement (PMC4936093; doi:10.1186/s12870-016-0832-2), 2016-07-07
Supplement: 12870_2016_832_MOESM4_ESM.pdf [file 12870_2016_832_MOESM4_ESM.pdf]

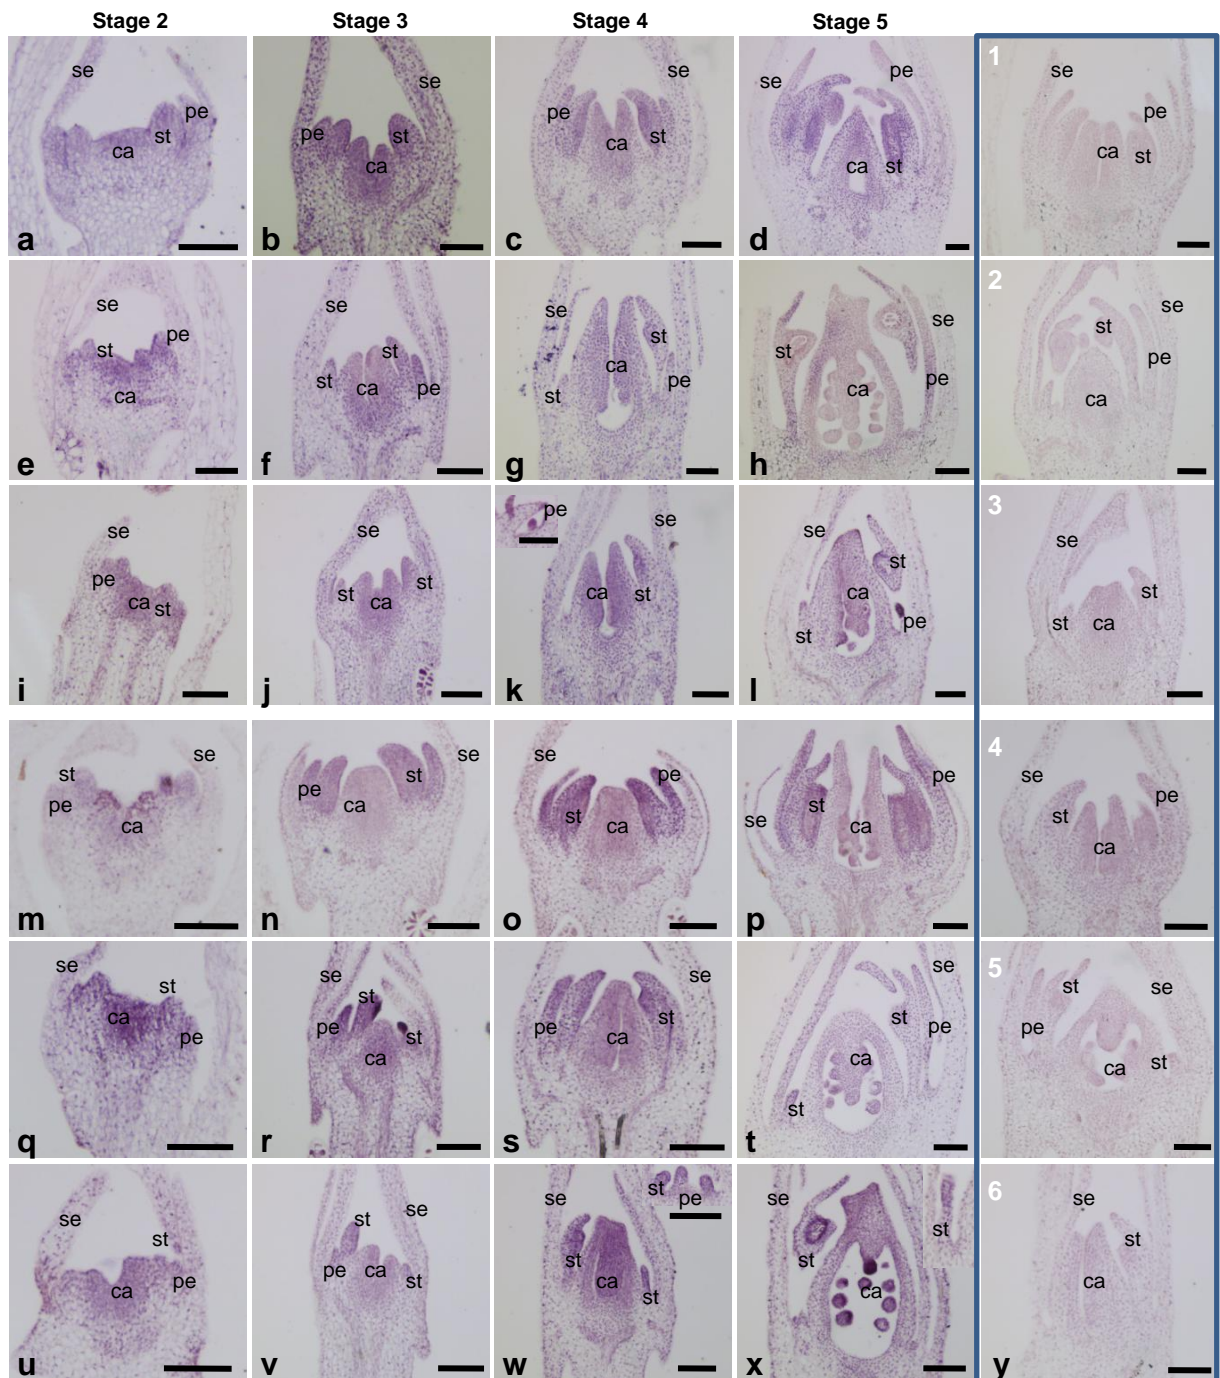

**Figure S2.** Gene expression during floral organogenesis and development.

**a-l** *VpTM6* (both *VpTM6-1* and *VpTM6-2*) expression during stages 2 to 5 of CH, inCL, and CL flowers. **a-d** CH flowers. **e-h** inCL flowers. **i-l** CL flowers. **m-x** The *VpPI* expression during stages 2 to 5 of CH, inCL, and CL flowers. **m-p** CH flowers. **q-t** inCL flowers. **u-x** CL flowers. Determination of gene expression levels was performed using *in situ* hybridization. The developmental stages are defined as that in Fig. 2. **y** Hybridization was performed using sense probes. The 1, 2, and 3 indicate *VpTM6*, whereas 4, 5, and 6 represent *VpPI*. Bars = 100  $\mu\text{m}$ . se, sepal; pe, petal; st, stamen; ca, carpel.
