# Supplementary material for: Expression of B-class MADS-box genes in response to variations in photoperiod is associated with chasmogamous and cleistogamous flower development in Viola philippica
Source: PubMed Central journal article supplement (PMC4936093; doi:10.1186/s12870-016-0832-2), 2016-07-07
Supplement: 12870_2016_832_MOESM6_ESM.pdf [file 12870_2016_832_MOESM6_ESM.pdf]

**Table S3.** The reduction extent of organ size and gene expression in the CH-CL transition.

| Flower type | The reduction ratio of stamen number | The reduction ratio of petal number | The reduction ratio of stamen length | The reduction ratio of petal length | The reduction ratio of <i>VpTM6-1</i> expression level |      |      |      |      | The reduction ratio of <i>VpTM6-2</i> expression level |      |      |      |      | The reduction ratio of <i>VpP1</i> expression level |      |      |      |      |
|-------------|--------------------------------------|-------------------------------------|--------------------------------------|-------------------------------------|--------------------------------------------------------|------|------|------|------|--------------------------------------------------------|------|------|------|------|-----------------------------------------------------|------|------|------|------|
|             |                                      |                                     |                                      |                                     | F11                                                    | F12  | Mf   | S    | P    | F11                                                    | F12  | Mf   | S    | P    | F11                                                 | F12  | Mf   | S    | P    |
| inCL        | 0.55±0.28                            | 0.74±0.36                           | 0.58±0.05                            | 0.95±0.02                           | 0.70                                                   | 0.84 | 0.71 | 0.70 | 0.92 | 0.67                                                   | 0.85 | 0.82 | 0.71 | 0.92 | 0.87                                                | 0.86 | 0.68 | 0.66 | 0.86 |
| CL          | 0.60±0.00                            | 1.00±0.00                           | 0.65±0.03                            | 0.98±0.01                           | 0.76                                                   | 0.86 | 0.52 | 0.76 | -    | 0.90                                                   | 0.92 | 0.71 | 0.77 | -    | 0.90                                                | 0.89 | 0.65 | 0.63 | -    |

The reduction ratio of organ size / number in CL and inCL flowers is relative to CH flowers, at least 10 flowers were randomly analyzed in each flower type. The reduction ratio of gene expression in different floral tissues is relative to these in CH flowers (Figure 6). F11, F12 and Mf was defined in Figure 6. S, stamens; P, petals. The - indicates no petal in CL flowers.
