# Supplementary material for: Expression of B-class MADS-box genes in response to variations in photoperiod is associated with chasmogamous and cleistogamous flower development in Viola philippica
Source: PubMed Central journal article supplement (PMC4936093; doi:10.1186/s12870-016-0832-2), 2016-07-07
Supplement: 12870_2016_832_MOESM7_ESM.pdf [file 12870_2016_832_MOESM7_ESM.pdf]

**Table S4.** The primers used in the present study.

| Function                     | Gene name      | Sequence (5'-3')                                                        |
|------------------------------|----------------|-------------------------------------------------------------------------|
| Degenerate primers           | <i>VpTM6</i>   | CACYGTTCTYTGYGATGC<br>AGRAGAMGGTTTCCATGTCTTTC                           |
|                              | <i>VpPI</i>    | AGCCCTTCWACTWCGYTGRTT<br>CACDCGGAARGMAAAWGGYA                           |
| 5'-RACE PCR                  | <i>VpTM6</i>   | TTCGTCTGAAGTGGCTGGGCTGATA                                               |
|                              | <i>VpPI</i>    | ACAGCTCAACCAGCGAAGTAGAAGGACT                                            |
| 3' -RACE PCR                 | <i>VpTM6</i>   | CCATGAGTATATCAGCCCAGCCACTTC                                             |
|                              | <i>VpPI</i>    | AGGATGAAACCAAGCGCCTCAGC<br>CATGGGGAAGAAGAGAAGAGACCT                     |
| Full-length cDNA             | <i>VpTM6-1</i> | AGCGGCAGGCTAGCTTGATTTC                                                  |
|                              | <i>VpTM6-2</i> | CATGGGGAAGAAGAGAAGAGACCT<br>AGCGGCAGGCTAGCTTGATTTC                      |
|                              | <i>VpPI</i>    | TCCCTTTGAATCTTCTATCTTCTT<br>TAGGCAATAGACCCATGAGGTAGA                    |
| qRT-PCR                      | <i>18SRNA</i>  | AAGACGAACAACCTGCGAAAGC<br>AGCAACATCCGCCAATCC                            |
|                              | <i>VpTM6-1</i> | GGATTGGTGGACAATGAGGGAT<br>CTCCATGGTGGAGCTCATGA                          |
|                              | <i>VpTM6-2</i> | GGGTTGGTGGACGATGAGGGAG<br>TTCCGTGGTGGAGATCATGG                          |
|                              | <i>VpPI</i>    | GAGCTAAGTCACCTCAAAGGGAAG<br>AACACCAGTAAGACCAGTTTCAAGG                   |
| <i>in situ</i> hybridization | <i>VpTM6</i>   | ATAGGGGAGGATTTGGATGACCTGTAATACGACTCACTATA<br>GGGTCAAGGAAGGCGGAGTTCGTG   |
|                              | <i>VpPI</i>    | TGTGGGATGCTAAACATGAGAACCTAATACGACTCACTATA<br>GGGGGAAAAAGGCATCTGGGAGTTAT |
| Yeast-two hybrid             | <i>VpTM6-1</i> | AGCATATGGGTCGTGGAAGATTGAG<br>AAGAATTCTCAAGGAAGGCGGAGTTCGTG              |
|                              | <i>VpTM6-2</i> | AGCATATGGGTCGTGGAAGATTGAG<br>AAGAATTCTCAAGGAAGGCGGAGTTCGTG              |
|                              | <i>VpPI</i>    | AGCATATGGGAGAGGAAAGATTGAG<br>AAGGATCCTTAAATCCTTTCCTGCAGATTTGG           |
