# Supplementary material for: Expression of B-class MADS-box genes in response to variations in photoperiod is associated with chasmogamous and cleistogamous flower development in Viola philippica
Source: PubMed Central journal article supplement (PMC4936093; doi:10.1186/s12870-016-0832-2), 2016-07-07
Supplement: 12870_2016_832_MOESM8_ESM.pdf [file 12870_2016_832_MOESM8_ESM.pdf]

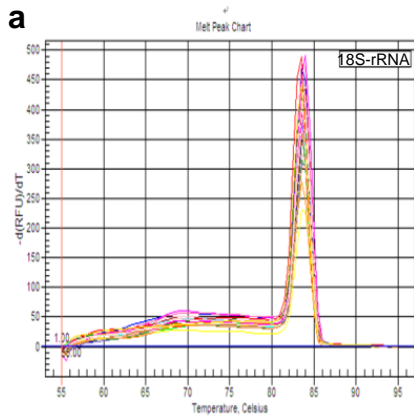

**b**

| Gene / primer |   | GC% | Product length (bp) | Primer specificity | Primer efficiency |
|---------------|---|-----|---------------------|--------------------|-------------------|
| 18S-RNA       | F | 48  | 136                 | √                  | 100%              |
|               | R | 56  |                     |                    |                   |
| VpTM6-1       | F | 50  | 127                 | √                  | 100%              |
|               | R | 55  |                     |                    |                   |
| VpTM6-2       | F | 63  | 115                 | √                  | 100%              |
|               | R | 55  |                     |                    |                   |
| VpPI          | F | 50  | 96                  | √                  | 100%              |
|               | R | 44  |                     |                    |                   |

**Figure S4.** Primer evaluation for qRT-PCR.

**a** Melt curve peak chart of genes studied, using 18S rRNA gene as a representation. The occurrence of unique signal peak indicates that the primers are strongly gene-specific. The topology of melt curve peak charts of other genes was similar. **b** Summary of essential information of the primers for qRT-PCR. F, forward primer; R, reverse primer. √ indicates strong gene-specificity of the primers.
